# Supplementary material
Source: HighWire-hosted journal article supplement (https://ejhp.bmj.com/content/32/2/100)
Supplement: inline-supplementary-material-3 [file inline-supplementary-material-3.pdf]

Supplementary File 3: Algorithm for use of MMAT

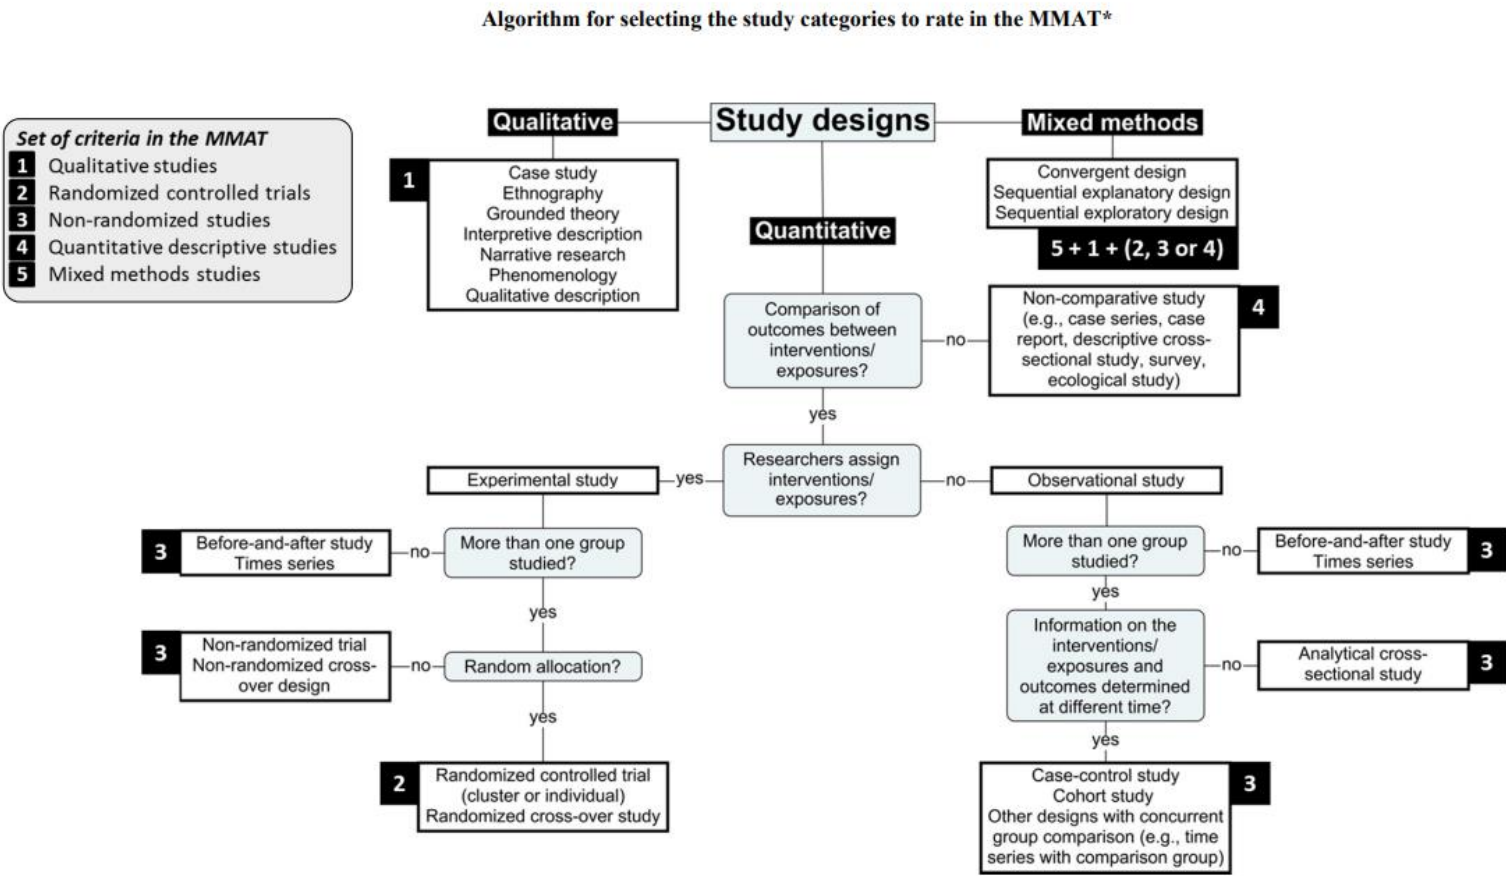

\*Adapted from National Institute for Health Care Excellence. (2012). *Methods for the development of nice public health guidance*. London: National Institute for Health and Care Excellence; and Scottish Intercollegiate Guidelines Network. (2017). *Algorithm for classifying study design for questions of effectiveness*. Retrieved December 1, 2017, from [http://www.sign.ac.uk/assets/study\\_design.pdf](http://www.sign.ac.uk/assets/study_design.pdf).
