# Supplementary material
Source: HighWire-hosted journal article supplement (https://ejhp.bmj.com/content/32/2/100)
Supplement: inline-supplementary-material-6 [file inline-supplementary-material-6.pdf]

**Supplementary File 5: questionnaire table**

| Element measured by questionnaire                                                                                                                                                                                                                                                                                                           | How measured                                                                                                                           | Number of items        | Where accessed and language choices                                     | Reference                            |
|---------------------------------------------------------------------------------------------------------------------------------------------------------------------------------------------------------------------------------------------------------------------------------------------------------------------------------------------|----------------------------------------------------------------------------------------------------------------------------------------|------------------------|-------------------------------------------------------------------------|--------------------------------------|
| Staff awareness and interest on sustainable development.                                                                                                                                                                                                                                                                                    | Open-ended questions.                                                                                                                  | Not available          | Not available                                                           | Rouvière <i>et al.</i> , 2022 [9]    |
| 1. Level of environmental "maturity" of healthcare product suppliers.<br>2. Integration of SD criteria into procurement procedures by healthcare product buyers.                                                                                                                                                                            | Self-assessment using a four-point Likert scale (--/-/+/>++).                                                                          | 30                     | Available in French and English.                                        | Giraud <i>et al.</i> , 2022 [10]     |
| 1. Pharmacist's awareness of the Sustainable Development Unit (SDU) and Coalition for Sustainable Pharmaceuticals and Medical Devices (CSPM).<br>2. Barriers to including sustainability in clinical decision-making processes.<br>3. If they believe pharmacists have a responsibility and the power to address these identified barriers. | Yes/No and one open-ended questions.                                                                                                   | 5                      | Published in appendix 2 of publication. Available in English.           | Singleton <i>et al.</i> , 2022 [11]  |
| Staff satisfaction of new intervention.                                                                                                                                                                                                                                                                                                     | Net Promoter Score (NPS) measured from 1 (not at all satisfied) to 10 (high user satisfaction).                                        | 1                      | Not available                                                           | Mouarbes <i>et al.</i> , 2022 [12]   |
| Pharmaceutical waste disposal methods.                                                                                                                                                                                                                                                                                                      | Structured checklist adopted from Logistics Indicator Assessment Tool (LIAT) and World Health Organisation waste management checklist. | Not available          | Not available                                                           | Mohammed <i>et al.</i> , 2021 [14]   |
| Knowledge of how to dispose of unused and out-of-date medicines.                                                                                                                                                                                                                                                                            | Yes/No and multiple-choice questions.                                                                                                  | 7                      | Published as Table 2 of publication. Available in Tigrigna and English. | Gidey <i>et al.</i> , 2020 [16]      |
| Feasibility and importance of activities implemented by pharmacists to reduce drug wastage.                                                                                                                                                                                                                                                 | Modified Bekker's questionnaire.                                                                                                       | 21 activities measured | Available in English and Arabic.                                        | Alhomoud, 2020 [17]                  |
| Activities undertaken by pharmacists and their importance and feasibility.                                                                                                                                                                                                                                                                  | Yes/No for if activity undertaken, plus importance and feasibility both measured on a 1 (not) to 5 (very) scale.                       | 16 activities measured | Published in Appendix B of publication.                                 | Bekker <i>et al.</i> , 2018 [20]     |
| Quantification and characterization of expired and unused medications at home. Attitude and method of medication disposal.                                                                                                                                                                                                                  | Open-ended, yes/No and multiple-choice questions                                                                                       | 16                     | Published in Appendix-A of publication. Available in English and Arabic | Al-Shareef <i>et al.</i> , 2016 [23] |
