# Supplementary material
Source: HighWire-hosted journal article supplement (https://ejhp.bmj.com/content/32/2/100)
Supplement: inline-supplementary-material-7 [file inline-supplementary-material-7.pdf]

Supplementary File 4: Risk of bias, detailed table

| Leraut et al., 2022 [13] | Mouarbes et al., 2022 [12] | Singleton et al., 2022 [11] | Giraud et al., 2022 [10] | Rouvière et al., 2022 [9] |                                                                                                                    |                                     |
|--------------------------|----------------------------|-----------------------------|--------------------------|---------------------------|--------------------------------------------------------------------------------------------------------------------|-------------------------------------|
| Yes                      | Yes                        | Yes                         | Yes                      | Yes                       | P1. Are there clear research questions?                                                                            | PRELIMINARY QUESTIONS               |
| Yes                      | Yes                        | Yes                         | Yes                      | Yes                       | P2. Do the data collected answer the research questions?                                                           |                                     |
|                          | Yes                        |                             |                          | Yes                       | Are the participants representative of the target population?                                                      | NON-RANDOMISED QUANTITATIVE STUDIES |
|                          | Yes                        |                             |                          | Yes                       | Are the measurements appropriate regarding both the outcome and intervention (or exposure)?                        |                                     |
|                          | Yes                        |                             |                          | Yes                       | Are the data on effects (outcomes) complete?                                                                       |                                     |
|                          | Yes                        |                             |                          | Yes                       | Are the confounders accounted for in the design and analysis?                                                      |                                     |
|                          | Yes                        |                             |                          | Yes                       | During the study period did the intervention (or did the exposure) take place as planned?                          | DESCRIPTIVE QUANTITATIVE STUDIES    |
|                          |                            |                             |                          |                           | Is the sampling strategy relevant to address the research question?                                                |                                     |
|                          |                            |                             |                          |                           | Is the sample representative of the target population?                                                             |                                     |
|                          |                            |                             |                          |                           | Are the measurements appropriate?                                                                                  |                                     |
|                          |                            |                             |                          |                           | Is the risk of non-response bias low?                                                                              |                                     |
|                          |                            |                             |                          |                           | Is the statistical analysis appropriate to answer the research question?                                           | STUDIES WITH MIXED METHODS          |
| Yes                      |                            | Yes                         | Yes                      |                           | Is there an adequate rationale for using a mixed methods design to address the research question?                  |                                     |
| Yes                      |                            | Yes                         | Yes                      |                           | Are the different components of the study effectively integrated to answer the research question?                  |                                     |
| Yes                      |                            | Can' t tell                 | Yes                      |                           | Are the outputs of the integration of qualitative and quantitative components adequately interpreted?              |                                     |
| Can' t tell              |                            | Can' t tell                 | Can' t tell              |                           | Are divergences and inconsistencies between quantitative and qualitative results adequately addressed?             |                                     |
| Yes                      |                            | Yes                         | Yes                      |                           | Do the different components of the study adhere to the quality criteria of each tradition of the methods involved? |                                     |

Supplemental material

Eur J Hosp Pharm

Pitard M, et al. *Integration of qualitative and quantitative components adequately interpreted?* 2024;15. doi: 10.1136/ejpharm-2024-004098

|                         |                     |                         |                             |                            |                                                                                                                    |                                     |
|-------------------------|---------------------|-------------------------|-----------------------------|----------------------------|--------------------------------------------------------------------------------------------------------------------|-------------------------------------|
| Tsang et al., 2019 [18] | Alhomoud, 2020 [17] | Gidey et al., 2020 [16] | Barbariol et al., 2021 [15] | Mohammed et al., 2021 [14] |                                                                                                                    |                                     |
| Yes                     | Yes                 | Yes                     | Yes                         | Yes                        | P1. Are there clear research questions?                                                                            | PRELIMINARY QUESTIONS               |
| Yes                     | Yes                 | Yes                     | Yes                         | Yes                        | P2. Do the data collected answer the research questions?                                                           |                                     |
| Yes                     |                     |                         | Yes                         |                            | Are the participants representative of the target population?                                                      | NON-RANDOMISED QUANTITATIVE STUDIES |
| Yes                     |                     |                         | Yes                         |                            | Are the measurements appropriate regarding both the outcome and intervention (or exposure)?                        |                                     |
| Can' t tell             |                     |                         | Can' t tell                 |                            | Are the data on effects (outcomes) complete?                                                                       |                                     |
| Yes                     |                     |                         | Yes                         |                            | Are the confounders accounted for in the design and analysis?                                                      |                                     |
| Yes                     |                     |                         | Yes                         |                            | During the study period did the intervention (or did the exposure) take place as planned?                          |                                     |
|                         | Yes                 | Yes                     |                             | Yes                        | Is the sampling strategy relevant to address the research question?                                                | DESCRIPTIVE QUANTITATIVE STUDIES    |
|                         | Yes                 | Yes                     |                             | Yes                        | Is the sample representative of the target population?                                                             |                                     |
|                         | Yes                 | Yes                     |                             | Yes                        | Are the measurements appropriate?                                                                                  |                                     |
|                         | Can' t tell         | Can' t tell             |                             | Can' t tell                | Is the risk of non-response bias low?                                                                              |                                     |
|                         | Yes                 | Yes                     |                             | Yes                        | Is the statistical analysis appropriate to answer the research question?                                           |                                     |
|                         |                     |                         |                             |                            | Is there an adequate rationale for using a mixed methods design to address the research question?                  | STUDIES WITH MIXED METHODS          |
|                         |                     |                         |                             |                            | Are the different components of the study effectively integrated to answer the research question?                  |                                     |
|                         |                     |                         |                             |                            | Are the outputs of the integration of qualitative and quantitative components adequately interpreted?              |                                     |
|                         |                     |                         |                             |                            | Are divergences and inconsistencies between quantitative and qualitative results adequately addressed?             |                                     |
|                         |                     |                         |                             |                            | Do the different components of the study adhere to the quality criteria of each tradition of the methods involved? |                                     |

|                              |                            |                          |                          |                                                        |                                                                                                                    |                                     |
|------------------------------|----------------------------|--------------------------|--------------------------|--------------------------------------------------------|--------------------------------------------------------------------------------------------------------------------|-------------------------------------|
| Al-Shareef et al., 2016 [23] | Furukawa et al., 2016 [22] | Abbasi et al., 2017 [21] | Bekker et al., 2018 [20] | Lin et al., 2018 [19]                                  |                                                                                                                    |                                     |
| Yes                          | Yes                        | Yes                      | Yes                      | Yes                                                    | P1. Are there clear research questions?                                                                            | PRELIMINARY QUESTIONS               |
| Yes                          | Yes                        | Yes                      | Yes                      | Yes                                                    | P2. Do the data collected answer the research questions?                                                           |                                     |
|                              | Yes                        | Yes                      |                          | Yes                                                    | Are the participants representative of the target population?                                                      | NON-RANDOMISED QUANTITATIVE STUDIES |
|                              | Yes                        | Yes                      |                          | Yes                                                    | Are the measurements appropriate regarding both the outcome and intervention (or exposure)?                        |                                     |
|                              | Can' t tell                | Can' t tell              |                          | Yes                                                    | Are the data on effects (outcomes) complete?                                                                       |                                     |
|                              | Can' t tell                | Yes                      |                          | Can' t tell                                            | Are the confounders accounted for in the design and analysis?                                                      |                                     |
|                              | Yes                        | Yes                      |                          | Yes                                                    | During the study period did the intervention (or did the exposure) take place as planned?                          | DESCRIPTIVE QUANTITATIVE STUDIES    |
| Yes                          |                            |                          |                          |                                                        | Is the sampling strategy relevant to address the research question?                                                |                                     |
| Yes                          |                            |                          |                          |                                                        | Is the sample representative of the target population?                                                             |                                     |
| Yes                          |                            |                          |                          |                                                        | Are the measurements appropriate?                                                                                  |                                     |
| Can' t tell                  |                            |                          |                          |                                                        | Is the risk of non-response bias low?                                                                              |                                     |
| Yes                          |                            |                          |                          |                                                        | Is the statistical analysis appropriate to answer the research question?                                           |                                     |
|                              |                            |                          | Yes                      |                                                        | Is there an adequate rationale for using a mixed methods design to address the research question?                  | STUDIES WITH MIXED METHODS          |
|                              |                            |                          | Yes                      |                                                        | Are the different components of the study effectively integrated to answer the research question?                  |                                     |
|                              |                            |                          | Can' t tell              | Pitard M, et al. Eur J Hosp Pharm 2025; 33(4): 495-501 | Are the outputs of the integration of qualitative and quantitative components adequately interpreted?              |                                     |
|                              |                            |                          | Can' t tell              |                                                        | Are divergences and inconsistencies between quantitative and qualitative results adequately addressed?             |                                     |
|                              |                            |                          | Yes                      |                                                        | Do the different components of the study adhere to the quality criteria of each tradition of the methods involved? |                                     |

|                           |                            |                                                                                                                    |                                     |
|---------------------------|----------------------------|--------------------------------------------------------------------------------------------------------------------|-------------------------------------|
| Toerper et al., 2014 [25] | Mosquera et al., 2014 [24] |                                                                                                                    |                                     |
| Yes                       | Yes                        | P1. Are there clear research questions?                                                                            | PRELIMINARY QUESTIONS               |
| Yes                       | Yes                        | P2. Do the data collected answer the research questions?                                                           |                                     |
| Yes                       | Yes                        | Are the participants representative of the target population?                                                      | NON-RANDOMISED QUANTITATIVE STUDIES |
| Yes                       | Yes                        | Are the measurements appropriate regarding both the outcome and intervention (or exposure)?                        |                                     |
| Yes                       | Can' t tell                | Are the data on effects (outcomes) complete?                                                                       |                                     |
| No                        | Can' t tell                | Are the confounders accounted for in the design and analysis?                                                      |                                     |
| Yes                       | Yes                        | During the study period did the intervention (or did the exposure) take place as planned?                          |                                     |
|                           |                            | Is the sampling strategy relevant to address the research question?                                                | DESCRIPTIVE QUANTITATIVE STUDIES    |
|                           |                            | Is the sample representative of the target population?                                                             |                                     |
|                           |                            | Are the measurements appropriate?                                                                                  |                                     |
|                           |                            | Is the risk of non-response bias low?                                                                              |                                     |
|                           |                            | Is the statistical analysis appropriate to answer the research question?                                           |                                     |
|                           |                            | Is there an adequate rationale for using a mixed methods design to address the research question?                  | STUDIES WITH MIXED METHODS          |
|                           |                            | Are the different components of the study effectively integrated to answer the research question?                  |                                     |
|                           |                            | Are the outputs of the integration of qualitative and quantitative components adequately interpreted?              |                                     |
|                           |                            | Are divergences and inconsistencies between quantitative and qualitative results adequately addressed?             |                                     |
|                           |                            | Do the different components of the study adhere to the quality criteria of each tradition of the methods involved? |                                     |

Pitard M, et al. Eur J Hosp Pharm. 2025;33(4):405-411. doi: 10.1136/ejhp-2024-004098
