# Supplementary material
Source: HighWire-hosted journal article supplement (https://ejhp.bmj.com/content/32/2/100)

Supplementary file 6: Graphical abstract

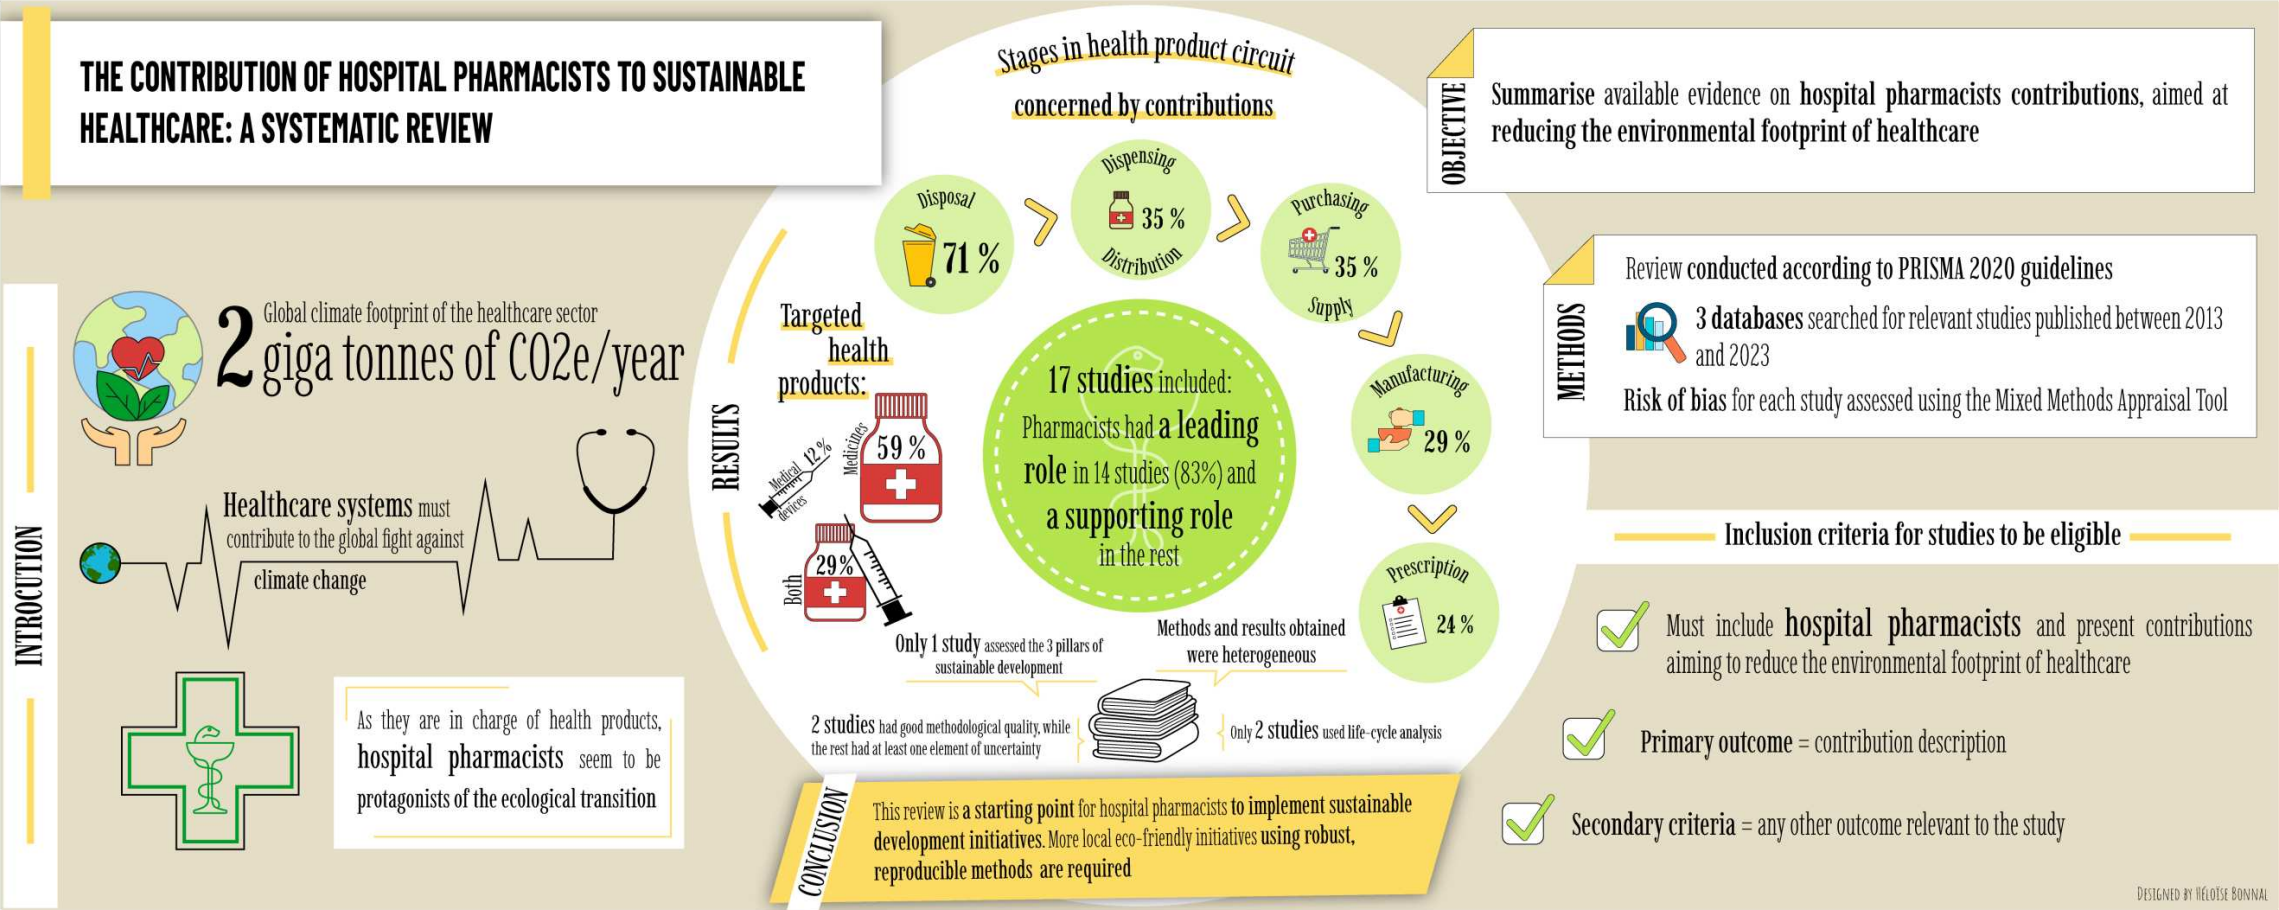

Supplement: inline-supplementary-material-8 [file inline-supplementary-material-8.pdf]
